# Supplementary material for: Development of Colorimetric Reverse Transcription Loop-Mediated Isothermal Amplification Assay for Detecting Feline Coronavirus
Source: MDPI journal article supplement (doi:10.3390/ani12162075), 2022-08-14
Supplement: s1 [file s1]

# Development of Colorimetric Reverse Transcription Loop-Mediated Isothermal Amplification Assay for Detecting Feline Coronavirus

Witsanu Rapichai, Wichayet Saejung, Kotchaporn Khumtong, Chaiwat Boonkaewwan, Supansa Tuanthap, Peter A. Lieberzeit, Kiattawee Choowongkamon and Jatuporn Rattanasrisomporn

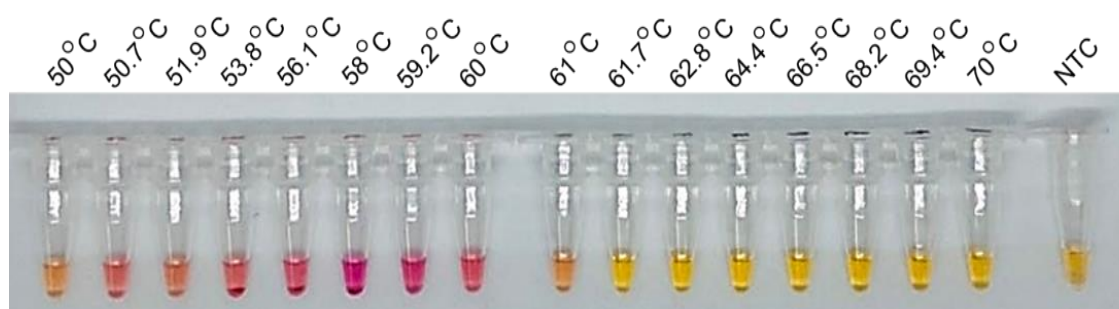

**Figure S1.** Gradient temperature optimization of RT-LAMP assay in the range 50–70°C. Pink color indicates positive reaction and yellow color indicates negative reaction. NTC, negative control.

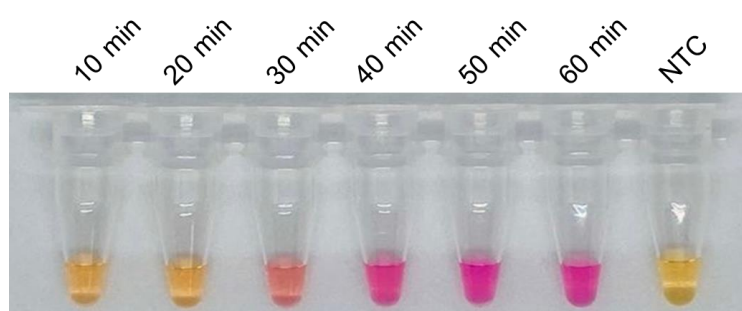

**Figure S2.** Effect of amplification times on RT-LAMP assay. Pink color indicates positive reaction and yellow color indicates negative reaction. NTC, negative control.

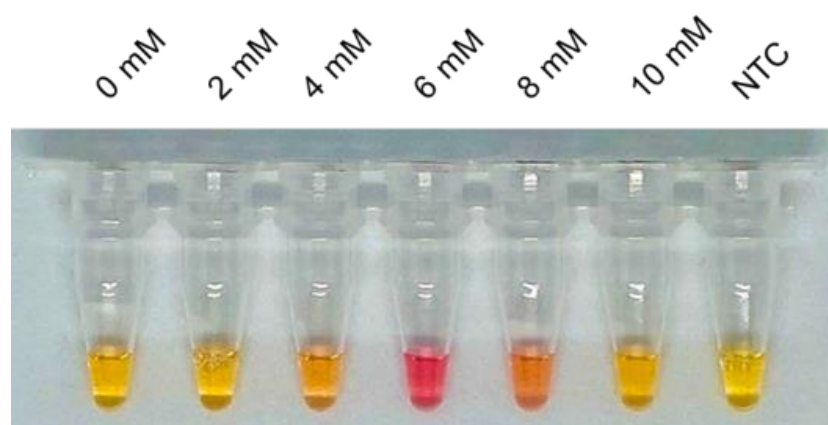

**Figure S3.** Effect of  $MgCl_2$  concentrations on RT-LAMP assay. Pink color indicates positive reaction and yellow color indicates negative reaction. NTC, negative control.

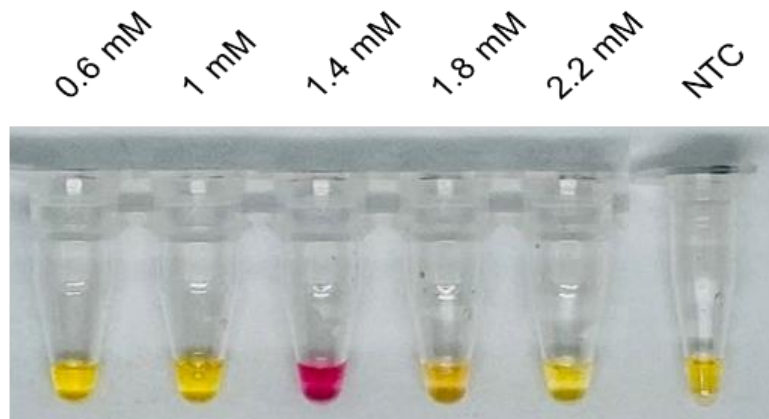

**Figure S4.** Effect of dNTP concentrations on RT-LAMP assay. Pink color indicates positive reaction and yellow color indicates negative reaction. NTC, negative control.

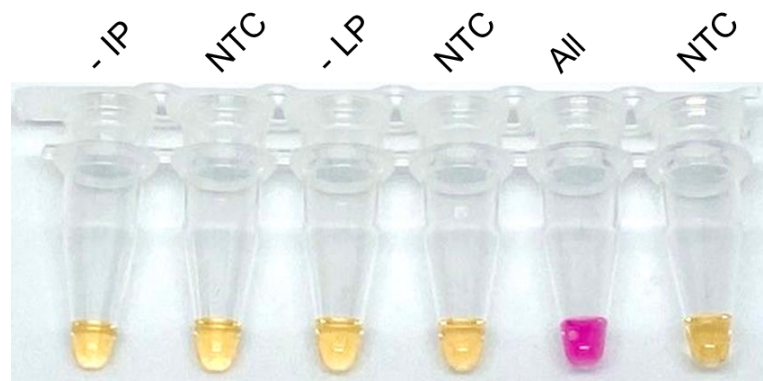

**Figure S5.** Primer requirement. Pink color indicates positive reaction and yellow color indicates negative reaction. NTC, negative control, IP, inner primers, LP, loop primers, and All, inner-, outer-, and loop primers.

**Table S1.** Clinical samples were tested with conventional PCR and RT-LAMP using the NR-based method and agarose gel electrophoresis method.

| Name | Specimen      | PCR<br>F7-R7Sc | RT-LAMP           |             |
|------|---------------|----------------|-------------------|-------------|
|      |               |                | neutral red-based | agarose gel |
| KU01 | body effusion | P              | P                 | P           |
| KU02 | body effusion | P              | P                 | P           |
| KU03 | body effusion | P              | P                 | P           |
| KU04 | body effusion | P              | P                 | P           |
| KU05 | body effusion | P              | P                 | P           |
| KU06 | body effusion | N              | P                 | P           |
| KU07 | body effusion | P              | P                 | P           |
| KU08 | body effusion | P              | P                 | P           |
| KU09 | body effusion | P              | P                 | P           |
| KU10 | body effusion | P              | P                 | P           |
| KU11 | body effusion | P              | P                 | P           |
| KU12 | body effusion | P              | P                 | P           |
| KU13 | body effusion | P              | P                 | P           |
| KU14 | body effusion | N              | N                 | N           |
| KU15 | body effusion | P              | P                 | P           |
| KU16 | body effusion | P              | P                 | P           |
| KU17 | body effusion | N              | N                 | N           |
| KU18 | body effusion | P              | P                 | P           |
| KU19 | body effusion | N              | N                 | N           |
| KU20 | body effusion | P              | P                 | P           |
| KU21 | body effusion | P              | P                 | P           |
| KU22 | body effusion | P              | P                 | P           |
| KU23 | body effusion | P              | P                 | P           |
| KU24 | body effusion | P              | P                 | P           |
| KU25 | body effusion | P              | P                 | P           |
| KU26 | body effusion | P              | P                 | P           |
| KU27 | body effusion | P              | P                 | P           |
| KU28 | body effusion | P              | P                 | P           |
| KU29 | body effusion | N              | N                 | N           |
| KU30 | body effusion | P              | P                 | P           |
| KU31 | body effusion | P              | P                 | P           |
| KU32 | body effusion | P              | P                 | P           |

| Name   | Specimen      | PCR<br>F7-R7Sc | RT-LAMP           |             |
|--------|---------------|----------------|-------------------|-------------|
|        |               |                | neutral red-based | agarose gel |
| KU33   | body effusion | P              | P                 | P           |
| KU34   | body effusion | P              | P                 | P           |
| KU35   | body effusion | P              | P                 | P           |
| KU36   | body effusion | N              | N                 | N           |
| KU37   | body effusion | P              | P                 | P           |
| KU40   | body effusion | P              | P                 | P           |
| KU41   | body effusion | P              | P                 | P           |
| KU42   | body effusion | P              | P                 | P           |
| KU43   | body effusion | P              | P                 | P           |
| KU44   | body effusion | P              | P                 | P           |
| KU45   | body effusion | P              | P                 | P           |
| KU46   | body effusion | P              | P                 | P           |
| KU47   | body effusion | P              | P                 | P           |
| KU48   | body effusion | P              | P                 | P           |
| KU49   | body effusion | P              | P                 | P           |
| KU50   | body effusion | P              | P                 | P           |
| KU51   | body effusion | P              | P                 | P           |
| KU52   | body effusion | N              | N                 | N           |
| KU53   | body effusion | P              | P                 | P           |
| KU54   | body effusion | P              | P                 | P           |
| KU55   | body effusion | P              | P                 | P           |
| KU56   | body effusion | N              | N                 | N           |
| KU57   | body effusion | P              | P                 | P           |
| KU58   | body effusion | P              | P                 | P           |
| KU59   | body effusion | P              | P                 | P           |
| KU60   | body effusion | P              | P                 | P           |
| KU61/1 | body effusion | N              | N                 | N           |
| KU61/2 | body effusion | N              | N                 | N           |
| KU61/3 | body effusion | N              | N                 | N           |
| KU61/4 | body effusion | N              | N                 | N           |
| KU61/5 | body effusion | N              | N                 | N           |
| KU62   | body effusion | P              | P                 | P           |
| KU64   | body effusion | N              | N                 | N           |
| KU66/1 | body effusion | P              | P                 | P           |

| Name   | Specimen      | PCR<br>F7-R7Sc | RT-LAMP           |             |
|--------|---------------|----------------|-------------------|-------------|
|        |               |                | neutral red-based | agarose gel |
| KU66/2 | body effusion | P              | P                 | P           |
| KU66/3 | body effusion | P              | P                 | P           |
| KU67   | body effusion | N              | N                 | N           |
| KU68   | body effusion | P              | P                 | P           |
| KU71   | body effusion | P              | P                 | P           |
| KU72   | body effusion | P              | P                 | P           |
| KU73   | body effusion | P              | P                 | P           |
| KU74   | body effusion | N              | N                 | N           |
| KU75   | body effusion | P              | P                 | P           |
| KU76   | body effusion | P              | N                 | N           |
| KU77   | body effusion | N              | N                 | N           |
| KU78   | body effusion | P              | P                 | P           |
| KU79   | body effusion | P              | N                 | N           |
| KU80   | body effusion | P              | N                 | N           |
| KU81   | body effusion | P              | N                 | N           |
